# Supplementary material
Source: PubMed Central journal article supplement (PMC2847845)
Supplement: NIHMS184746-supplement-1_si_001.pdf [file NIHMS184746-supplement-1_si_001.pdf]

|                | 1 | 2 | 3 | 4 |
|----------------|---|---|---|---|
| rLOX-PP        | + | + | + | + |
| PNGase F       |   | + | + |   |
| O-glycosidases |   |   | + | + |

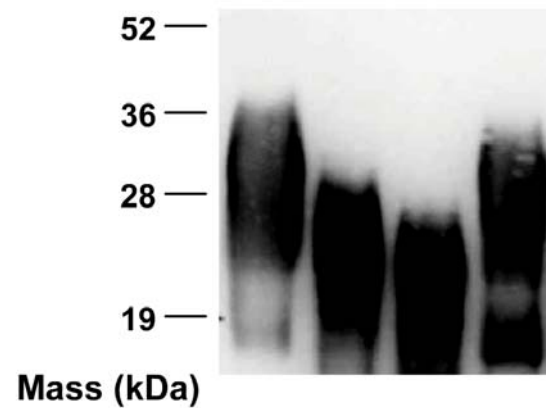

**Figure S1. Recombinant LOX-PP contains both O- and N- linked sugars (Western blot).** Deglycosylated rLOX-PP samples separated on a 12% SDS PAGE gel (as described in Figure 2) were analyzed by Western blotting using anti-LOX-PP antibody. Lane 1: rLOX-PP, lane 2: rLOX-PP + PNGase F, lane 3: rLOX-PP + PNGase F + O-glycosidases (Neuraminidase and O-glycosidase), lane 4 rLOX-PP + O-glycosidases only (Neuraminidase and O-glycosidase). Molecular weight markers are indicated in kDa.
